# Supplementary material for: Bacterial Analogs of Plant Tetrahydropyridine Alkaloids Mediate Microbial Interactions in a Rhizosphere Model System
Source: PubMed Central journal article supplement (PMC6498172; doi:10.1128/aem.03058-18), 2019-05-02
Supplement: AEM.03058-18-s0001.pdf [file AEM.03058-18-s0001.pdf]

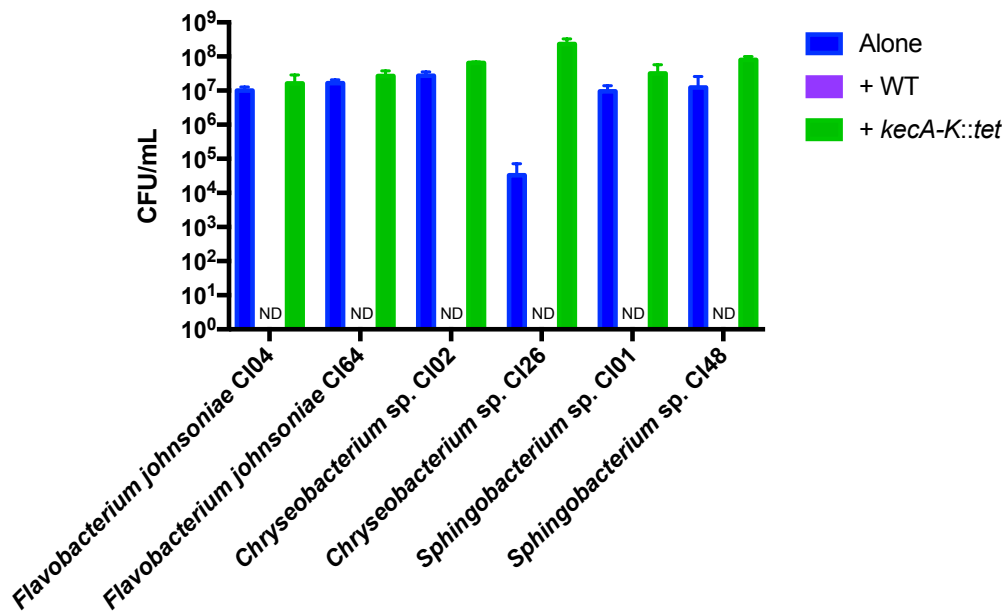

**FIG S1.** Evaluation of the role of the koreenceine gene cluster in inhibition of *F. johnsoniae* and other members of the Bacteroidetes. Population of several Bacteroidetes members isolated from the soybean rhizosphere when grown alone, with *P. koreensis* wild type, or *P. koreensis* *kecA-K::tet*. ND, not detected. Error bars represent  $\pm$  Standard deviation.

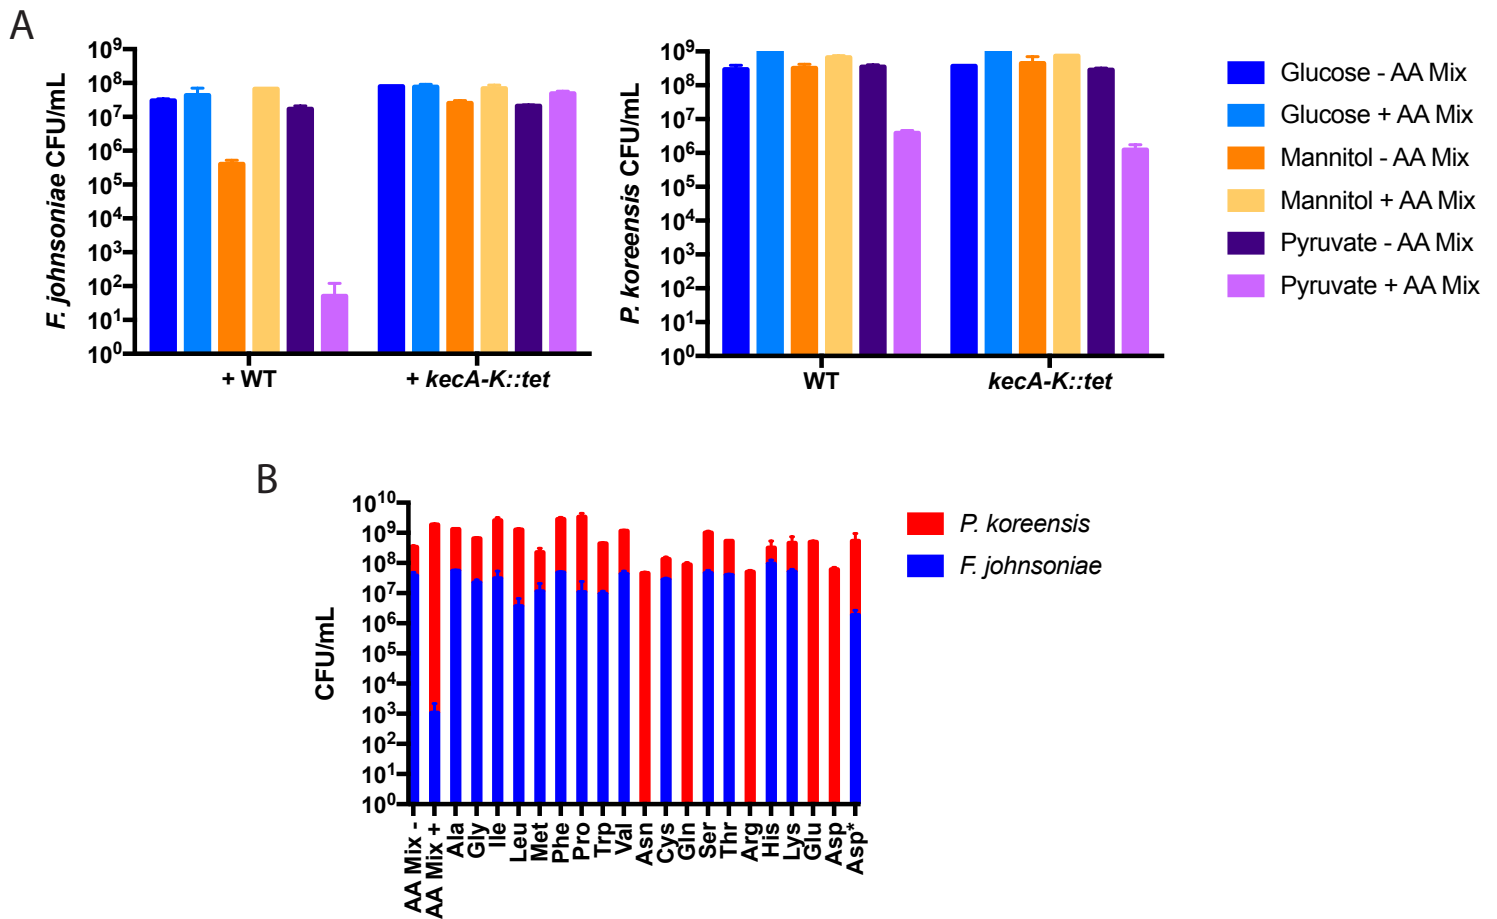

**FIG S2.** Development of a defined medium that supports the ability of *P. koreensis* to inhibit *F. johnsoniae*.  
 A) Population of *P. koreensis* and *F. johnsoniae* in co-culture in a defined medium with glucose, mannitol or pyruvate as carbon sources with or without an amino acid mixture. B) Population of *P. koreensis* and *F. johnsoniae* in co-culture in a defined medium with or without an amino acid mixture, or a single amino acid, or N-methyl-DL-aspartate (Asp\*) a non-hydrolysable analog of aspartate. Error bars represent  $\pm$  Standard deviation.

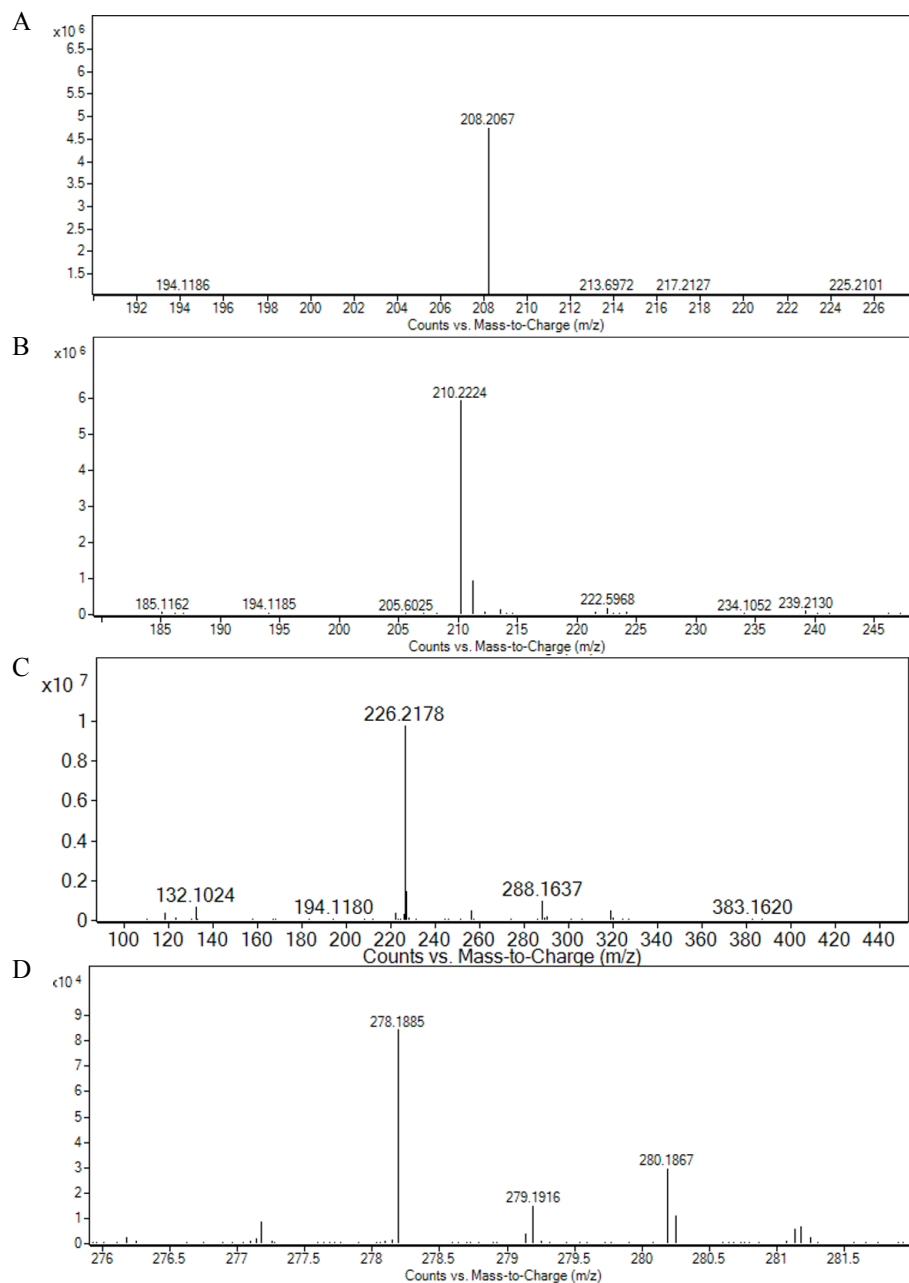

**FIG S3.** HRESIQTOFMS spectral data of compounds **1-4**

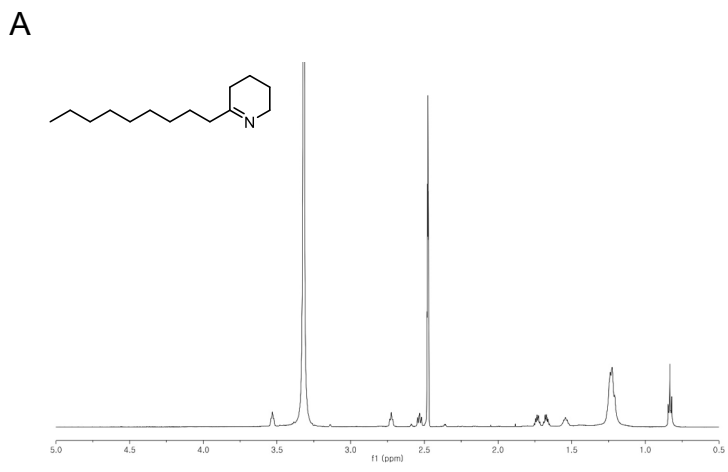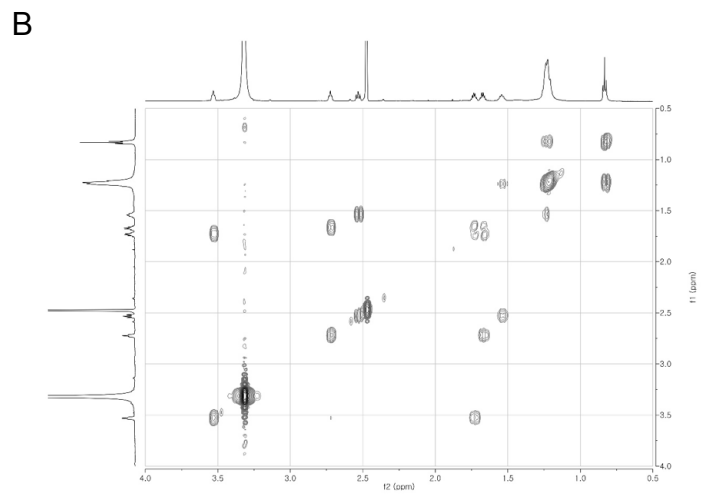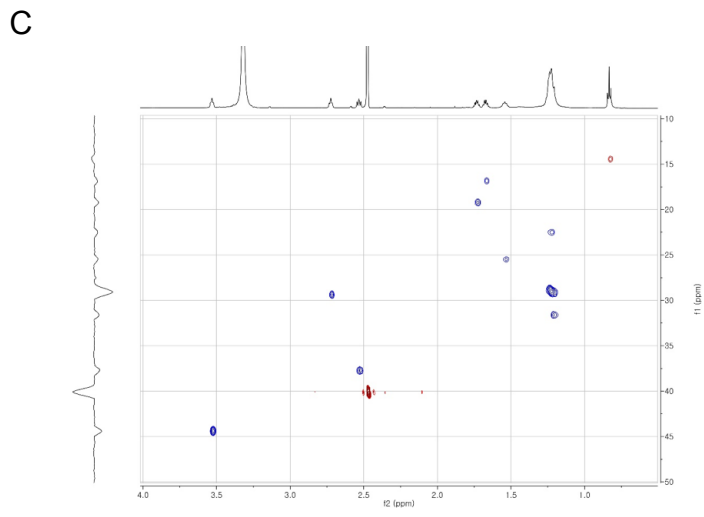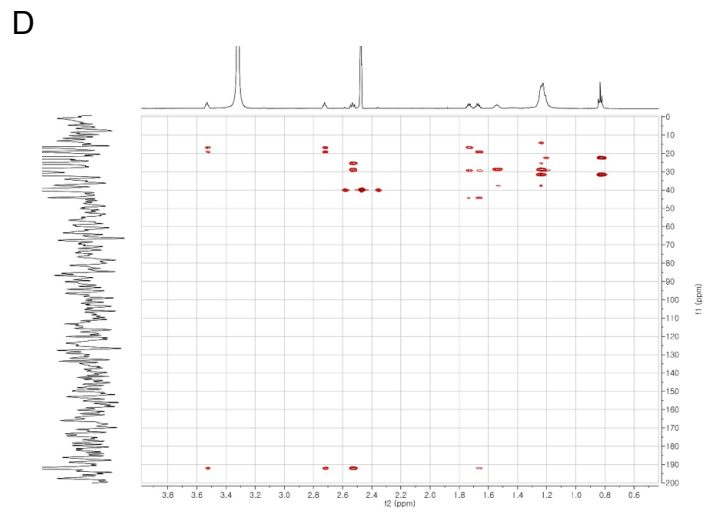

**FIG S4.** NMR spectra of compound 1

A

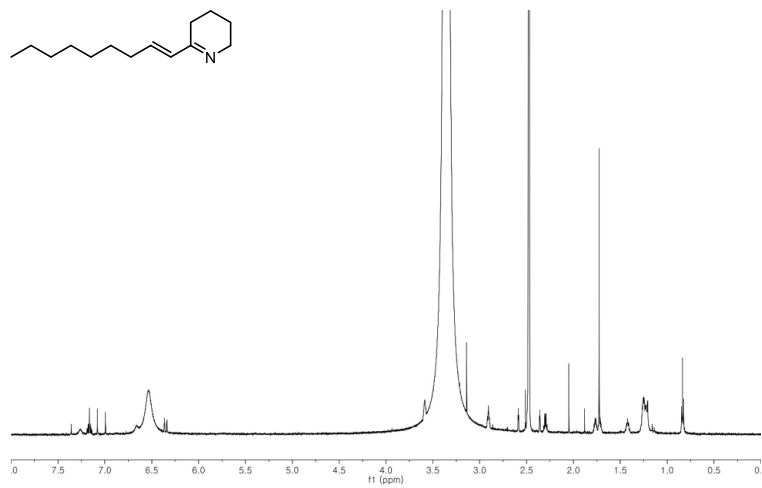

B

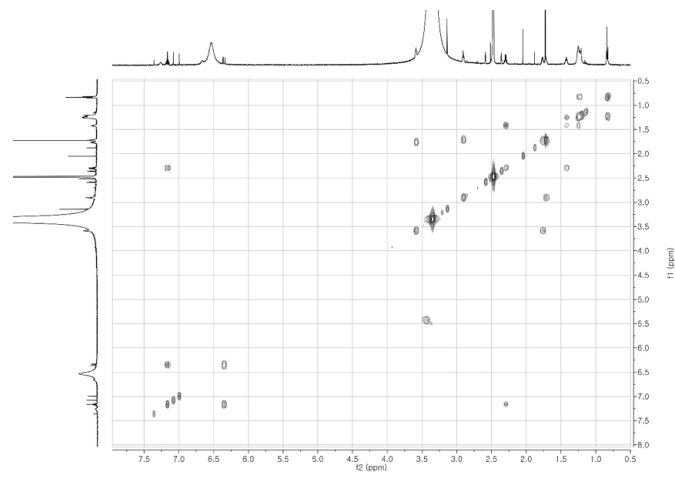

**FIG S5.** NMR spectra of compound **2**

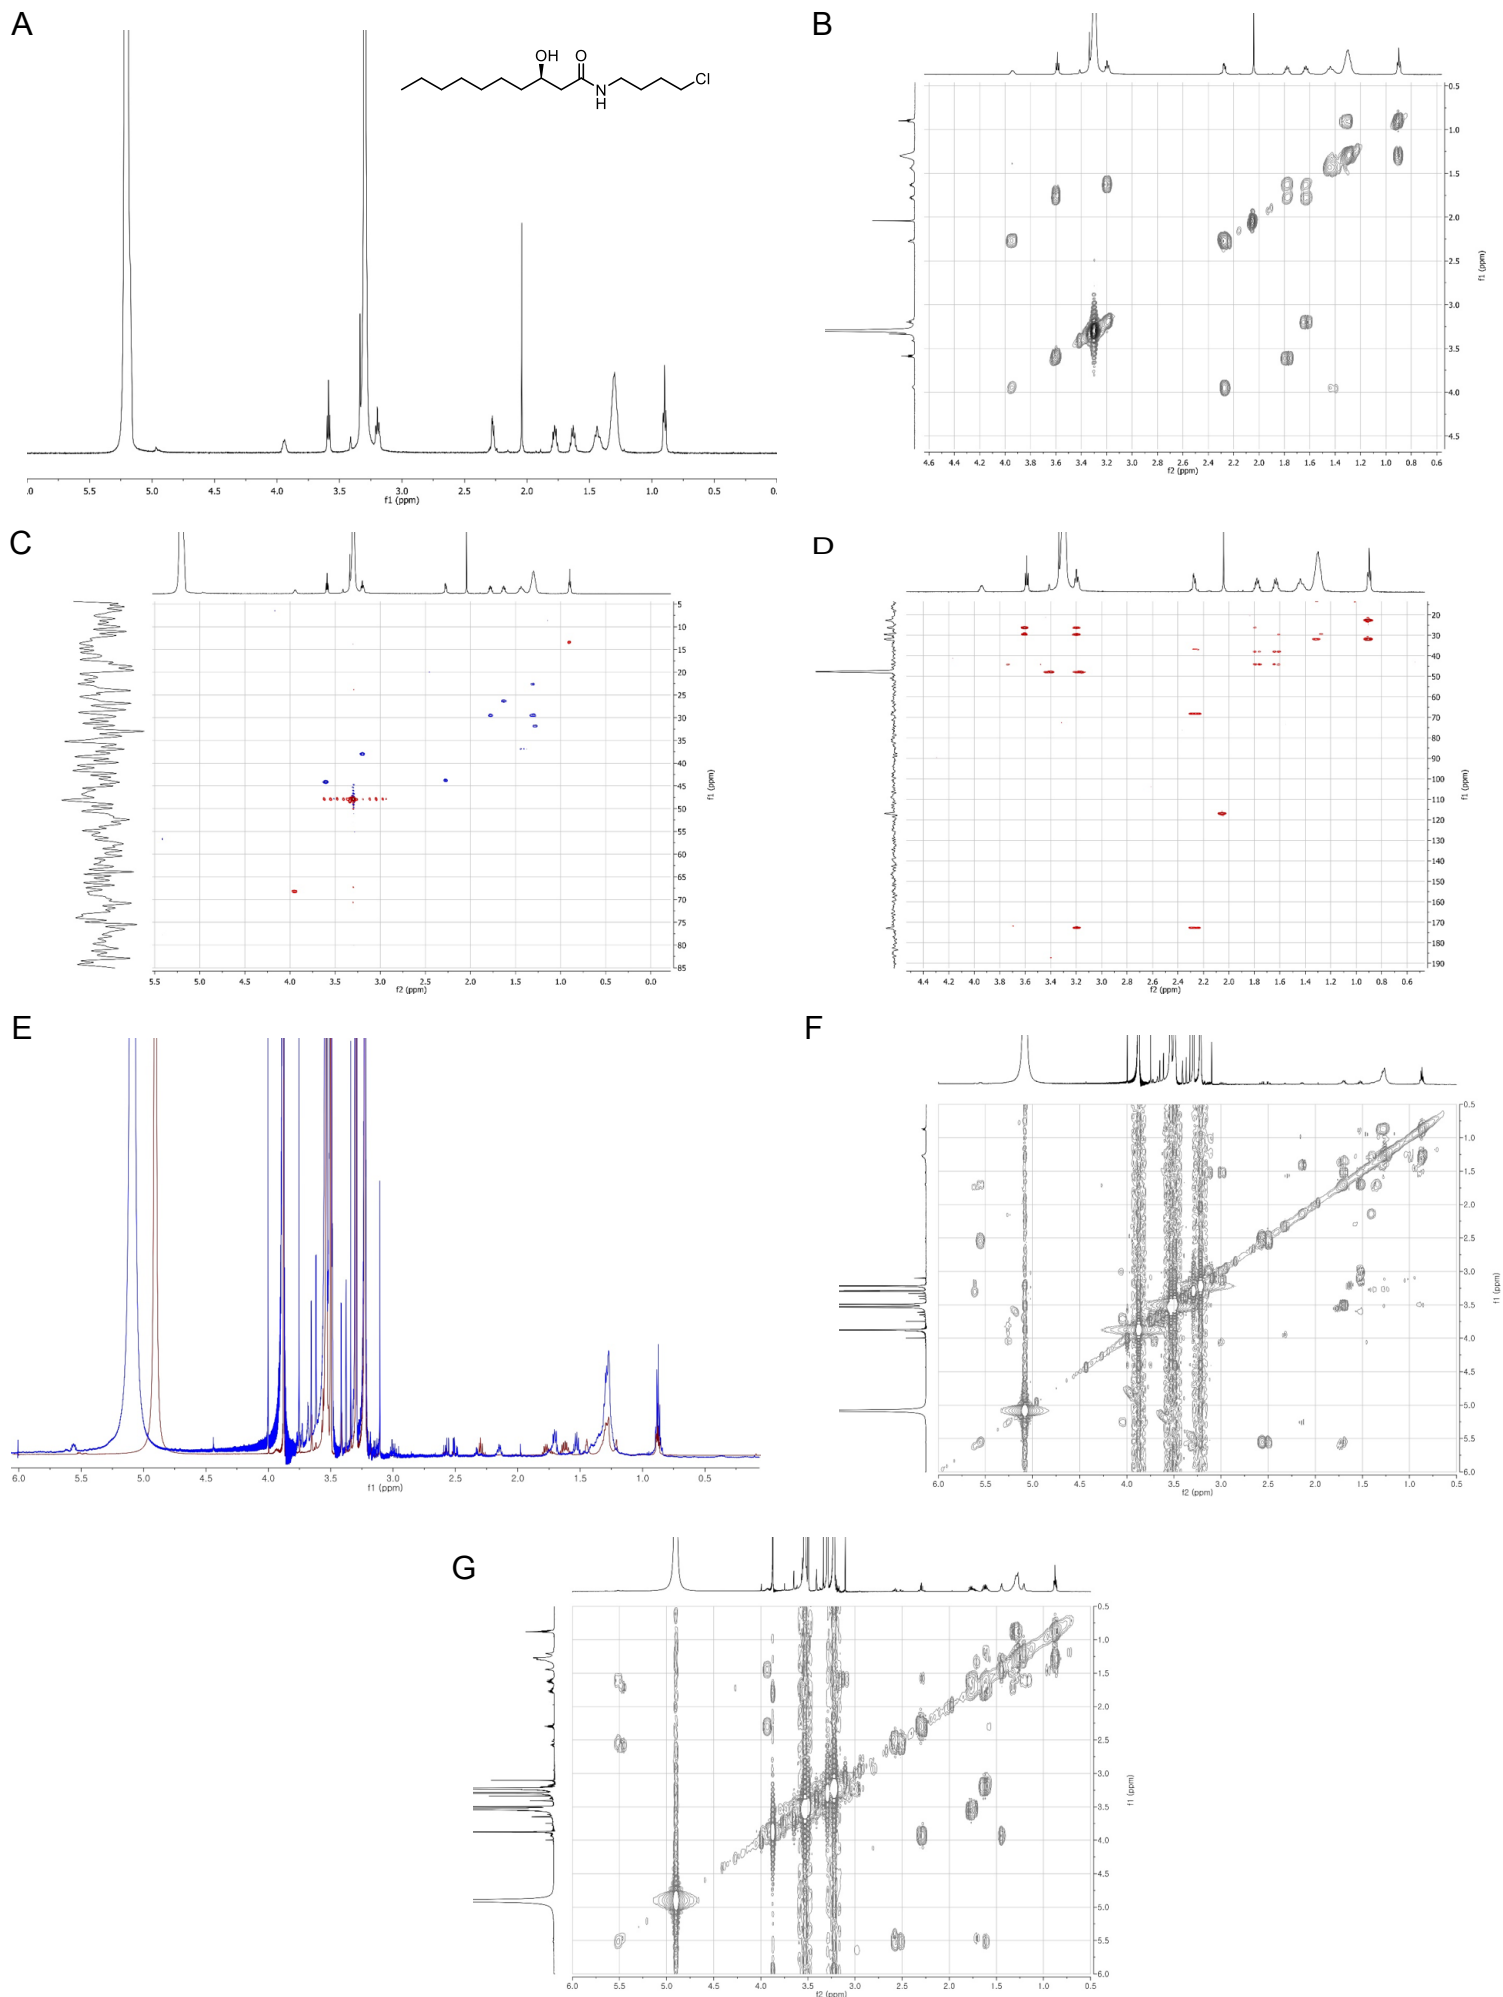

**FIG S6.** (A-D) NMR spectra of compound **4** (E)  $^1\text{H}$  NMR spectra comparison of S-MTPA (blue) and R-MTPA (maroon) of compound **4** (F) gCOSY NMR spectrum of S-MTPA of compound **4** (G) gCOSY NMR spectrum of R-MTPA of compound **4**

# Compound 1

## Observed MS/MS fragmentation pattern of koreenceine A

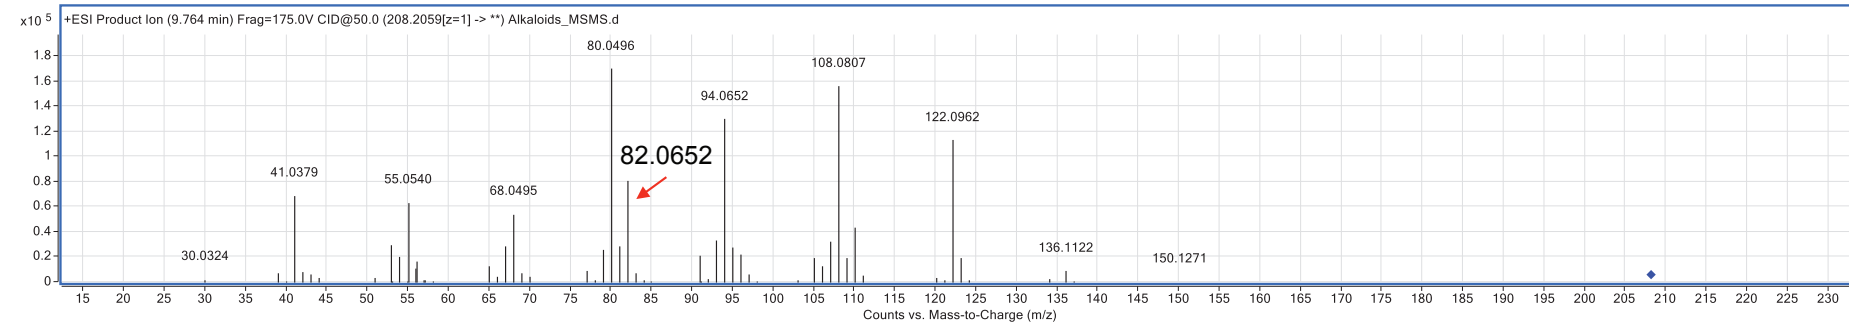

## Calculated MS/MS fragmentation pattern of koreenceine A

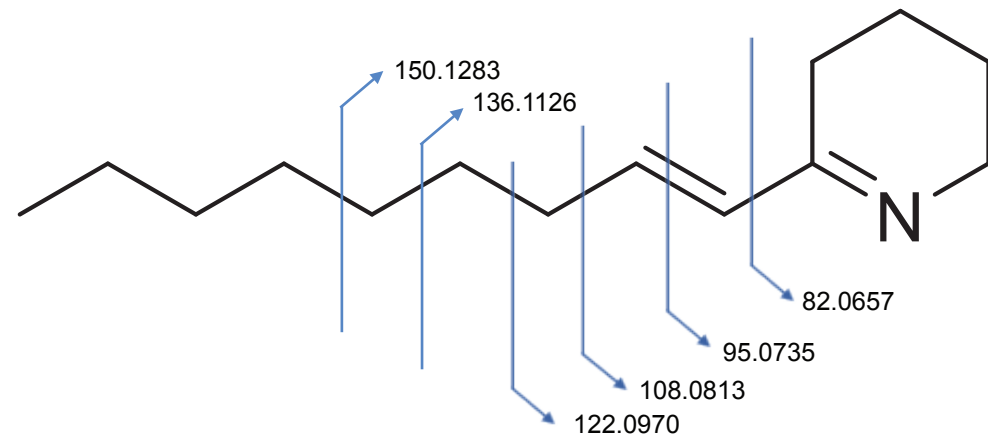

# Compound 2

## Observed MS/MS fragmentation pattern of koreenceine B

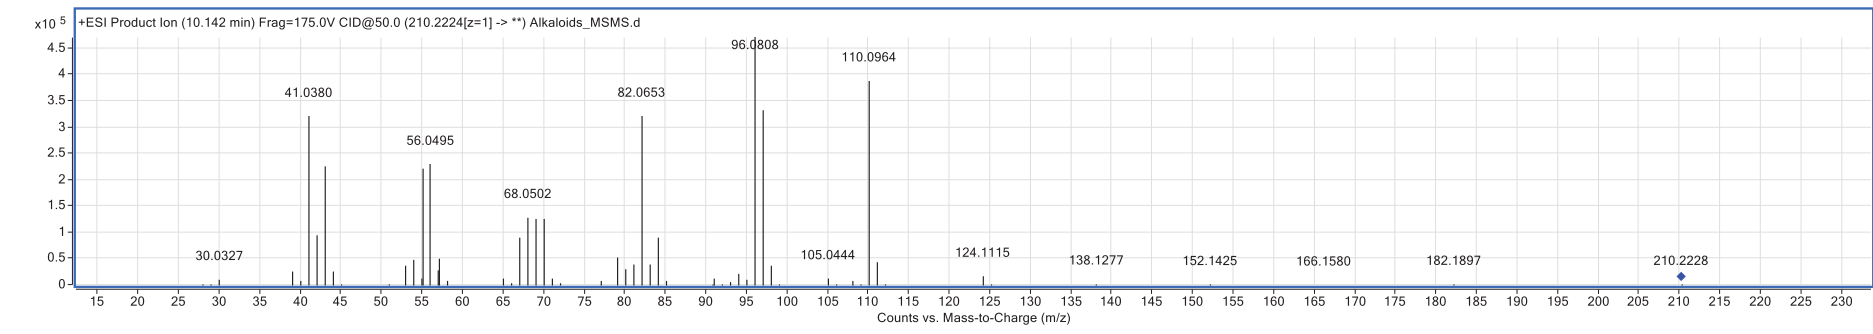

## Calculated MS/MS fragmentation pattern of koreenceine B

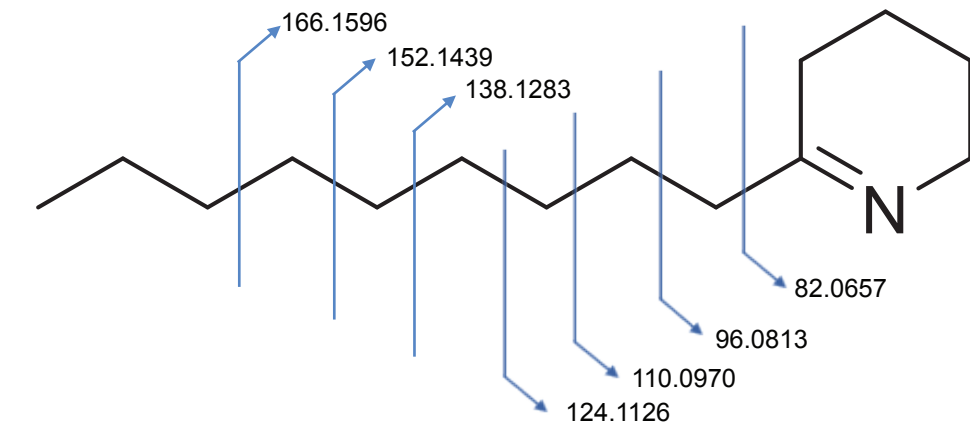

# Compound 3

## Observed MS/MS fragmentation pattern of koreenceine C

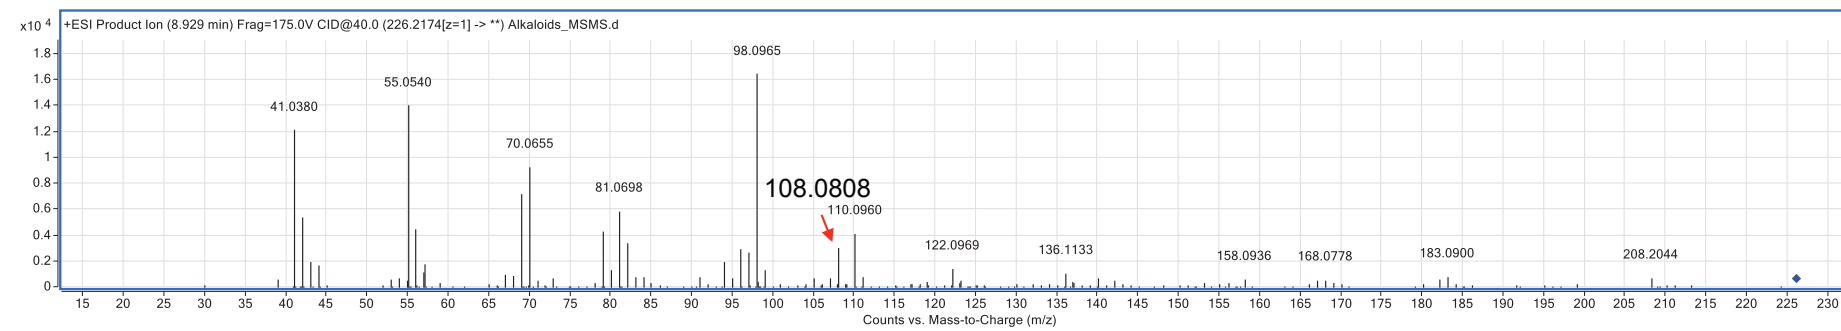

## Calculated MS/MS fragmentation pattern of koreenceine C

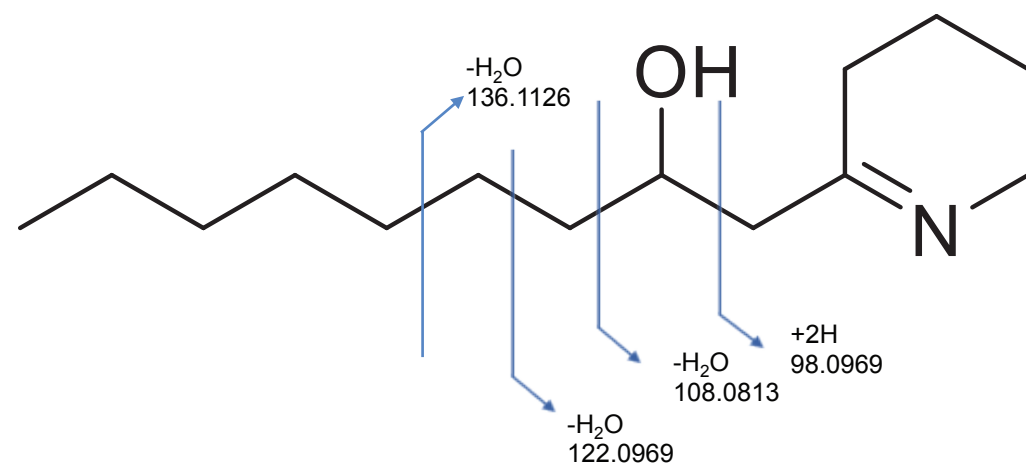

# Compound 4

## Observed MS/MS fragmentation pattern of koreenceine D

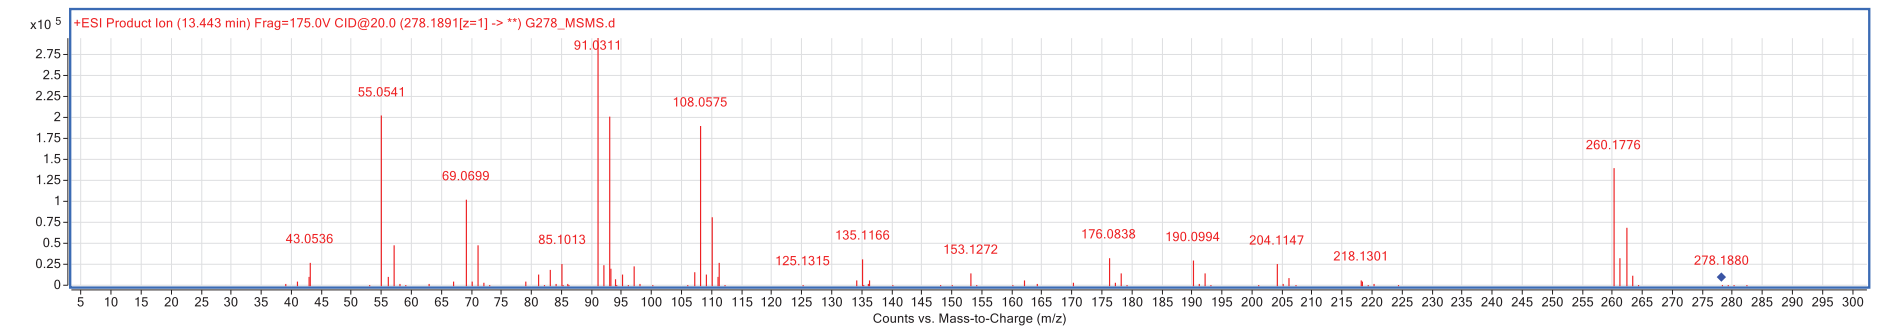

## Calculated MS/MS fragmentation pattern of koreenceine D

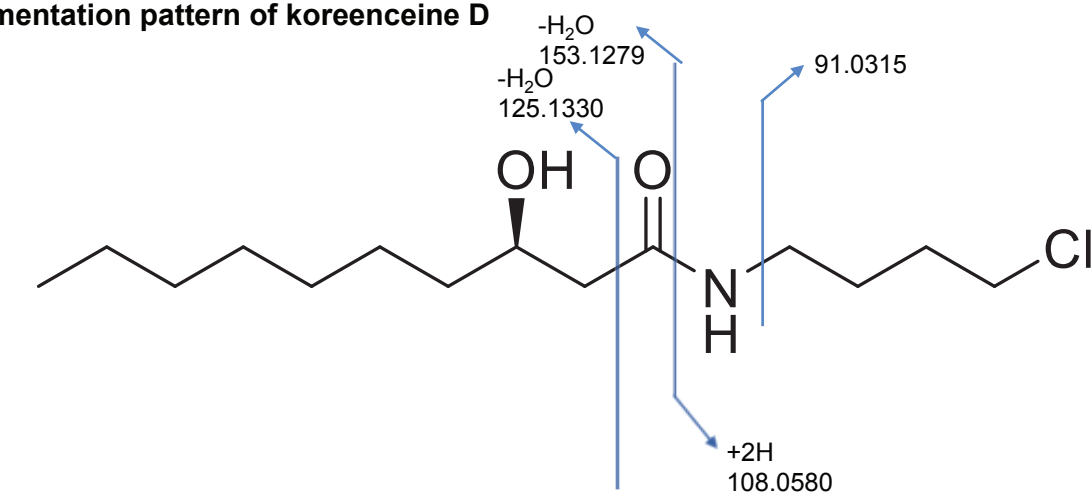

FIG S7. Tandem MS spectra of compounds 1-4

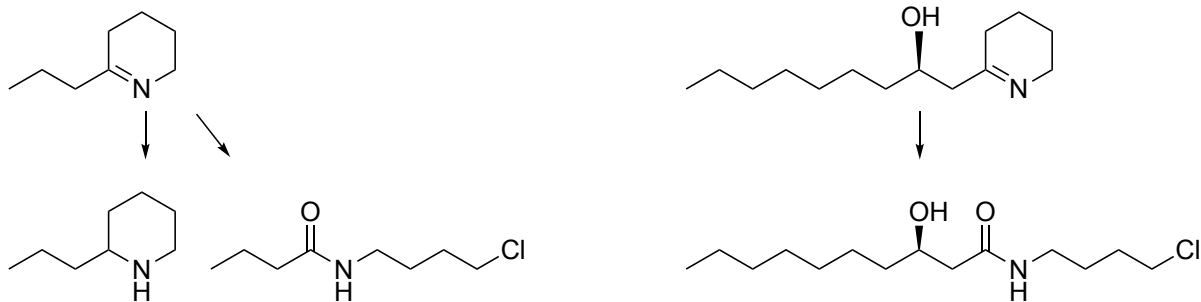

**FIG S8.** Predicted uncharacterized halogenation reaction and oxidation/reduction of  $\gamma$ -coniceine and koreenceine C.



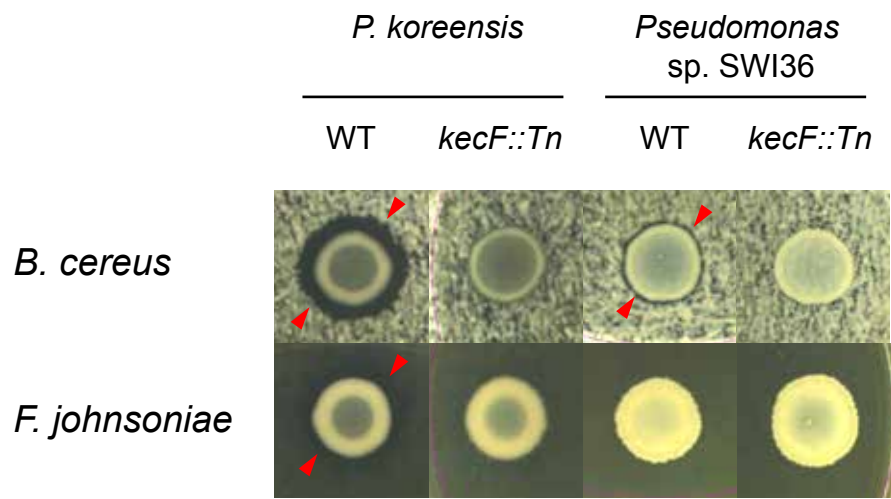

**FIG S9.** Activity profile of *P. koreensis* and *Pseudomonas* sp. SWI36 against *B. cereus* and *F. johnsoniae*.

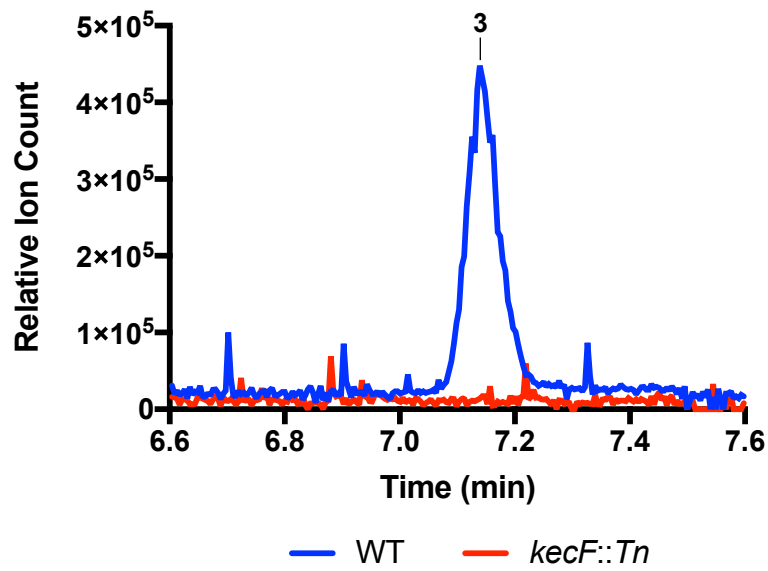

**FIG S10.** Extracted ion chromatograms of koreenceine C for *Pseudomonas* sp SWI36 wild type and *kecF::Tn* mutant.

Table S1. Bacterial genomes containing gene clusters with high similarity to the koreenceine cluster.

| Name                                   | Abbreviation | GenBank assembly accession | Koreenceine-like cluster clade |
|----------------------------------------|--------------|----------------------------|--------------------------------|
| [Flavobacterium] sp. 29                | 29           | GCA_002754355              | A                              |
| <i>Pseudomonas asplenii</i> 4A7        | 4A7          | GCA_002891515              | A                              |
| <i>Pseudomonas baetica</i> a390        | a390         | GCA_003031005              | A                              |
| <i>Pseudomonas baetica</i> LMG 25716   | LMG25716     | GCA_002813455              | A                              |
| <i>Pseudomonas fluorescens</i> NZ011   | NZ011        | GCA_000276585              | A                              |
| <i>Pseudomonas fluorescens</i> BW11P2  | BW11P2       | GCA_001679645              | A                              |
| <i>Pseudomonas fluorescens</i> C3      | C3           | GCA_000967955              | A                              |
| <i>Pseudomonas fluorescens</i> H16     | H16          | GCA_000802985              | A                              |
| <i>Pseudomonas fluorescens</i> MS82    | MS82         | GCA_003055645              | A                              |
| <i>Pseudomonas jessenii</i> LBp-160603 | LBp160603    | GCA_003205375              | A                              |
| <i>Pseudomonas koreensis</i> CI12      | CI12         | GCA_002003425              | A                              |
| <i>Pseudomonas mandelii</i> JR-1       | JR1          | GCA_000257545              | A                              |
| <i>Pseudomonas mandelii</i> PD30       | PD30         | GCA_000690555              | A                              |
| <i>Pseudomonas mandelii</i> LMG 21607  | LMG21607     | GCA_900106065              | A                              |
| <i>Pseudomonas prosekii</i> LMG 26867  | LMG26867     | GCA_900105155              | A                              |
| <i>Pseudomonas prosekii</i> P2406      | P2406        | GCA_003122265              | A                              |
| <i>Pseudomonas prosekii</i> P2673      | P2673        | GCA_003122305              | A                              |
| <i>Pseudomonas</i> sp. 31-12           | 3112         | GCA_003151075              | A                              |
| <i>Pseudomonas</i> sp. 43NM1           | 43NM1        | GCA_002836905              | A                              |
| <i>Pseudomonas</i> sp. AD21            | AD21         | GCA_002878485              | A                              |
| <i>Pseudomonas</i> sp. B15(2017)       | B152017      | GCA_002113215              | A                              |
| <i>Pseudomonas</i> sp. B17(2017)       | B172017      | GCA_002113765              | A                              |
| <i>Pseudomonas</i> sp. B2(2017)        | B22017       | GCA_002113685              | A                              |
| <i>Pseudomonas</i> sp. B20(2017)       | B202017      | GCA_002113125              | A                              |
| <i>Pseudomonas</i> sp. B26(2017)       | B262017      | GCA_002113045              | A                              |
| <i>Pseudomonas</i> sp. B35(2017)       | B352017      | GCA_002113645              | A                              |
| <i>Pseudomonas</i> sp. B7(2017)        | B72017       | GCA_002112745              | A                              |
| <i>Pseudomonas</i> sp. FSL W5-0299     | FSLW50299    | GCA_002005125              | A                              |
| <i>Pseudomonas</i> sp. FW305-BF8       | FW305BF8     | GCA_002883215              | A                              |
| <i>Pseudomonas</i> sp. GM16            | GM16         | GCA_000282155              | A                              |
| <i>Pseudomonas</i> sp. GM24            | GM24         | GCA_000282235              | A                              |
| <i>Pseudomonas</i> sp. GV091           | GV091        | GCA_003053805              | A                              |
| <i>Pseudomonas</i> sp. Irchel s3a12    | Irchels3a12  | GCA_900187485              | A                              |
| <i>Pseudomonas</i> sp. Irchel s3f10    | Irchels3f10  | GCA_900187515              | A                              |
| <i>Pseudomonas</i> sp. Irchel s3h9     | Irchels3h9   | GCA_900187475              | A                              |

|                                           |           |               |   |
|-------------------------------------------|-----------|---------------|---|
| <i>Pseudomonas</i> sp. MPR-E5             | MPRE5     | GCA_002883015 | A |
| <i>Pseudomonas</i> sp. MS586              | MS586     | GCA_001594225 | A |
| <i>Pseudomonas</i> sp. Ok266              | ok266     | GCA_900110195 | A |
| <i>Pseudomonas</i> sp. OV221              | OV221     | GCA_003391605 | A |
| <i>Pseudomonas</i> sp. OV657              | OV657     | GCA_003386585 | A |
| <i>Pseudomonas</i> sp. R15(2017)          | R152017   | GCA_002112685 | A |
| <i>Pseudomonas</i> sp. R23(2017)          | R232017   | GCA_002112575 | A |
| <i>Pseudomonas</i> sp. R24(2017)          | R242017   | GCA_002113465 | A |
| <i>Pseudomonas</i> sp. R27(2017)          | R272017   | GCA_002113445 | A |
| <i>Pseudomonas</i> sp. Root329            | Root329   | GCA_001424925 | A |
| <i>Pseudomonas fluorescens</i> BS2        | BS2       | GCA_000308175 | B |
| <i>Pseudomonas fluorescens</i> AHK-1      | AHK1      | GCA_003363095 | B |
| <i>Pseudomonas fluorescens</i> FW300-N1B4 | FW300N1B4 | GCA_001625455 | B |
| <i>Pseudomonas hunanensis</i> P11         | P11       | GCA_002910975 | B |
| <i>Pseudomonas marginalis</i> BS2952      | BS2952    | GCA_900105325 | B |
| <i>Pseudomonas monteilii</i> SB3078       | SB3078    | GCA_000510285 | B |
| <i>Pseudomonas monteilii</i> SB3101       | SB3101    | GCA_000510325 | B |
| <i>Pseudomonas monteilii</i> MO2          | MO2       | GCA_001571445 | B |
| <i>Pseudomonas plecoglossicida</i> DJ-1   | DJ1       | GCA_002307455 | B |
| <i>Pseudomonas plecoglossicida</i> MR134  | MR134     | GCA_002864885 | B |
| <i>Pseudomonas plecoglossicida</i> MR135  | MR135     | GCA_002864795 | B |
| <i>Pseudomonas plecoglossicida</i> MR170  | MR170     | GCA_002864845 | B |
| <i>Pseudomonas plecoglossicida</i> MR69   | MR69      | GCA_002864775 | B |
| <i>Pseudomonas plecoglossicida</i> MR70   | MR70      | GCA_002864905 | B |
| <i>Pseudomonas plecoglossicida</i> MR83   | MR83      | GCA_002864865 | B |
| <i>Pseudomonas plecoglossicida</i> NyZ12  | NyZ12     | GCA_000831585 | B |
| <i>Pseudomonas plecoglossicida</i> TND35  | TND35     | GCA_000764405 | B |
| <i>Pseudomonas putida</i> B6-2            | B62       | GCA_000226035 | B |
| <i>Pseudomonas putida</i> BIRD-1          | BIRD1     | GCA_000183645 | B |
| <i>Pseudomonas putida</i> F1              | F1        | GCA_000016865 | B |
| <i>Pseudomonas putida</i> HB3267          | HB3267    | GCA_000325725 | B |
| <i>Pseudomonas putida</i> JB              | JB        | GCA_001767335 | B |
| <i>Pseudomonas putida</i> KT2440          | KT2440    | GCA_000007565 | B |
| <i>Pseudomonas putida</i> LS46            | LS46      | GCA_000294445 | B |
| <i>Pseudomonas putida</i> ND6             | ND6       | GCA_000264665 | B |
| <i>Pseudomonas putida</i> S12             | S12       | GCA_000495455 | B |
| <i>Pseudomonas putida</i> SJTE-1          | SJTE1     | GCA_000271965 | B |
| <i>Pseudomonas putida</i> Idaho           | Idaho     | GCA_000226475 | B |
| <i>Pseudomonas putida</i> CA-3            | CA3       | GCA_002810225 | B |

|                                         |             |               |   |
|-----------------------------------------|-------------|---------------|---|
| <i>Pseudomonas putida</i> DPA1          | DPA1        | GCA_002891885 | B |
| <i>Pseudomonas putida</i> strain DZ-C18 | DZC18       | GCA_002094795 | B |
| <i>Pseudomonas putida</i> FDAARGOS_409  | FDAARGOS409 | GCA_002554535 | B |
| <i>Pseudomonas putida</i> H             | H           | GCA_001077495 | B |
| <i>Pseudomonas putida</i> HB13667       | HB13667     | GCA_001306495 | B |
| <i>Pseudomonas putida</i> INSali382     | INSali382   | GCA_001653615 | B |
| <i>Pseudomonas putida</i> JLR11         | JLR11       | GCA_001183585 | B |
| <i>Pseudomonas putida</i> KCJK7911      | KCJK7911    | GCA_003053335 | B |
| <i>Pseudomonas putida</i> N1R           | N1R         | GCA_900156185 | B |
| <i>Pseudomonas putida</i> P1            | P1          | GCA_001865225 | B |
| <i>Pseudomonas putida</i> PD1           | PD1         | GCA_000799625 | B |
| <i>Pseudomonas putida</i> SF1           | SF1         | GCA_001027965 | B |
| <i>Pseudomonas putida</i> UV4           | UV4         | GCA_002165695 | B |
| <i>Pseudomonas putida</i> UV4/95        | UV495       | GCA_002165665 | B |
| <i>Pseudomonas putida</i> TRO1          | TRO1        | GCA_000367825 | B |
| <i>Pseudomonas taiwanensis</i> SJ9      | SJ9         | GCA_000500605 | B |
| <i>Pseudomonas</i> sp. 22 E 5           | 22E5        | GCA_900004705 | B |
| <i>Pseudomonas</i> sp. 2822-17          | 282217      | GCA_002742485 | B |
| <i>Pseudomonas</i> sp. 2995-1           | 29951       | GCA_002742505 | B |
| <i>Pseudomonas</i> sp. 31 E 5           | 31E5        | GCA_900005815 | B |
| <i>Pseudomonas</i> sp. 31 E 6           | 31E6        | GCA_900005935 | B |
| <i>Pseudomonas</i> sp. B12(2017)        | B122017     | GCA_002113785 | B |
| <i>Pseudomonas</i> sp. B13(2017)        | B132017     | GCA_002113245 | B |
| <i>Pseudomonas</i> sp. B14(2017)        | B142017     | GCA_002113255 | B |
| <i>Pseudomonas</i> sp. B22(2017)        | B222017     | GCA_002113105 | B |
| <i>Pseudomonas</i> sp. B23(2017)        | B232017     | GCA_002113725 | B |
| <i>Pseudomonas</i> sp. B24(2017)        | B242017     | GCA_002113085 | B |
| <i>Pseudomonas</i> sp. B28(2017)        | B282017     | GCA_002113025 | B |
| <i>Pseudomonas</i> sp. B4(2017)         | B42017      | GCA_002113565 | B |
| <i>Pseudomonas</i> sp. B8(2017)         | B82017      | GCA_002113575 | B |
| <i>Pseudomonas</i> sp. C5pp             | C5pp        | GCA_000814065 | B |
| <i>Pseudomonas</i> sp. CC6-YY-74        | CC6YY74     | GCA_002025205 | B |
| <i>Pseudomonas</i> sp. FFUP_PS_41       | FFUPPS41    | GCA_002858645 | B |
| <i>Pseudomonas</i> sp. FW305-E2         | FW305E2     | GCA_002901725 | B |
| <i>Pseudomonas</i> sp. GTC 16473        | GTC16473    | GCA_001753855 | B |
| <i>Pseudomonas</i> sp. GTC 16482        | GTC16482    | GCA_001319995 | B |
| <i>Pseudomonas</i> sp. Irchel 3H9       | Irchel3H9   | GCA_900187495 | B |
| <i>Pseudomonas</i> sp. JY-Q             | JYQ         | GCA_001655295 | B |
| <i>Pseudomonas</i> sp. Leaf58           | Leaf58      | GCA_001422615 | B |

|                                                     |             |               |   |
|-----------------------------------------------------|-------------|---------------|---|
| <i>Pseudomonas</i> sp. LG1E9                        | LG1E9       | GCA_003290225 | B |
| <i>Pseudomonas</i> sp. MIACH                        | MIACH       | GCA_001269925 | B |
| <i>Pseudomonas</i> sp. MR 02                        | MR02        | GCA_002797475 | B |
| <i>Pseudomonas</i> sp. NBRC 111118                  | NBRC111118  | GCA_001320085 | B |
| <i>Pseudomonas</i> sp. NBRC 111121                  | NBRC111121  | GCA_001320165 | B |
| <i>Pseudomonas</i> sp. NBRC 111125                  | NBRC111125  | GCA_001320295 | B |
| <i>Pseudomonas</i> sp. NBRC 111136                  | NBRC111136  | GCA_001320745 | B |
| <i>Pseudomonas</i> sp. NBRC 111139                  | NBRC111139  | GCA_001753955 | B |
| <i>Pseudomonas</i> sp. OV577                        | OV577       | GCA_003386595 | B |
| <i>Pseudomonas</i> sp. P21                          | p21         | GCA_001642705 | B |
| <i>Pseudomonas</i> sp. PGPPP2                       | PGPPP2      | GCA_002255825 | B |
| <i>Pseudomonas</i> sp. RIT357                       | RIT357      | GCA_000632245 | B |
| <i>Pseudomonas</i> sp. RW405                        | RW405       | GCA_003184135 | B |
| <i>Pseudomonas</i> sp. SID14000                     | SID14000    | GCA_002165135 | B |
| <i>Pseudomonas</i> sp. SMT-1                        | SMT1        | GCA_003204195 | B |
| <i>Pseudomonas</i> sp. SWI36                        | SWI36       | GCA_002948105 | B |
| <i>Pseudomonas</i> sp. XWY-1                        | XWY1        | GCA_002953115 | B |
| <i>Streptomyces albulus</i> CCRC 11814              | CCRC11814   | GCA_000403765 | C |
| <i>Streptomyces albulus</i> NK660                   | NK660       | GCA_000695235 | C |
| <i>Streptomyces albulus</i> PD-1                    | SaPD1       | GCA_000504065 | C |
| <i>Streptomyces albus</i> ZpM                       | ZpM         | GCA_000963515 | C |
| <i>Streptomyces diastatochromogenes</i> NRRL B-1698 | NRRLB1698   | GCA_001418405 | C |
| <i>Streptomyces noursei</i> ATCC 11455              | ATCC11455   | GCA_001704275 | C |
| <i>Streptomyces yunnanensis</i> CGMCC 4.3555        | CGMCC43555  | GCA_900142595 | C |
| <i>Streptomyces</i> sp. MspMP-M5                    | MspMPM5     | GCA_000373585 | C |
| <i>Streptomyces</i> sp. NRRL F-4489                 | NRRLF4489   | GCA_001509485 | C |
| <i>Xenorhabdus bovienii</i> CS03                    | CS031       | GCA_000973125 | D |
| <i>Xenorhabdus bovienii</i> CS03                    | CS032       | GCA_000973125 | D |
| <i>Xenorhabdus bovienii feltiae</i> Florida         | Florida     | GCA_000736675 | D |
| <i>Xenorhabdus bovienii feltiae</i> France          | France      | GCA_000736655 | D |
| <i>Xenorhabdus bovienii feltiae</i> Moldova         | Moldova     | GCA_000736595 | D |
| <i>Xenorhabdus bovienii</i> intermedium             | intermedium | GCA_000736615 | D |
| <i>Xenorhabdus bovienii</i> kraussei                | kraussei    | GCA_00073669  | D |
| <i>Xenorhabdus bovienii</i> kraussei Quebec         | Quebec      | GCA_000736555 | D |
| <i>Xenorhabdus bovienii</i> oregonense              | oregonense  | GCA_000736535 | D |
| <i>Xenorhabdus bovienii</i> puntauvense             | puntauvense | GCA_000736635 | D |
| <i>Xenorhabdus khoisanae</i> MCB sp. ICMP 17674     | ICMP17674   | GCA_001037465 | D |
| <i>Xenorhabdus poinarii</i> G6                      | G6          | GCA_000968175 | D |

|                                      |         |               |   |
|--------------------------------------|---------|---------------|---|
| <i>Xenorhabdus</i> sp. NBAII XenSa04 | XenSa04 | GCA_000798625 | D |
| Uncultured bacterium                 | pEAF66  | EU099626      |   |
